# Supplementary material for: Methylviologen mediated electrosynthesis of gold nanoparticles in the solution bulk
Source: Royal Society of Chemistry journal article supplement (doi:10.1039/c5ra21328b), 2015-12-10
Supplement: c5ra21328b1.pdf [file c5ra21328b1.pdf]

## Supplementary Information

### Methylviologen mediated electrosynthesis of gold nanoparticles in the solution bulk

Vitaliy V. Yanilkin,<sup>\*a</sup> Natalya V. Nastapova,<sup>a</sup> Gulnaz R. Nasretdinova,<sup>a</sup> Svetlana V. Fedorenko,<sup>a</sup> Michael E. Jilkin,<sup>b</sup> Asya R. Mustafina,<sup>a</sup> Aidar T. Gubaidullin,<sup>a</sup> and Yuri N. Osin<sup>b</sup>

<sup>a</sup> *A.E. Arbuzov Institute of Organic and Physical Chemistry, Kazan Scientific Center, Russian Academy of Sciences, Arbuzov St. 8, 420088 Kazan, Russia*

<sup>b</sup> *Kazan Federal University, Interdisciplinary Center for Analytical Microscopy, Kremlevskaya St. 18, 420018 Kazan, Russia*

\*Address correspondence to: yanilkin@iopc.ru

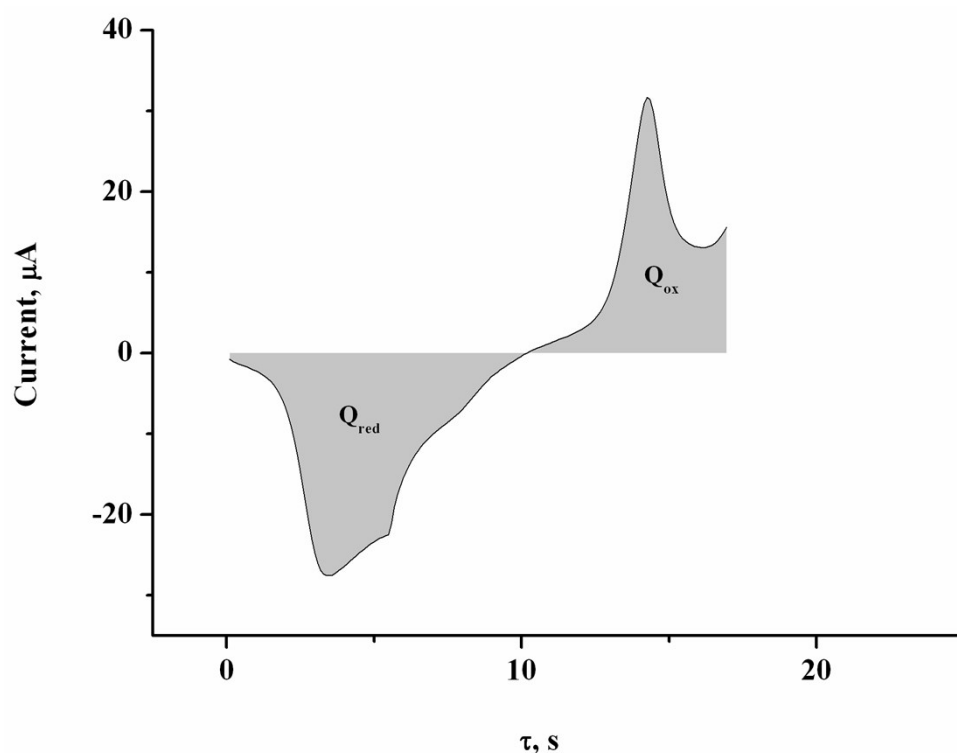

**Fig. S1** Current vs. time plot obtained by conversion of the cyclic voltammogram for AuCl presented in Fig. 1 (curve *a*).

**Table S1** Modes of Au(I) (1.5 mM) reduction under CV and microelectrolysis conditions and characteristics of Au<sub>dep</sub> formed.

| Mediator                     | Au(I) reduction             |                         |                            |                                | Au <sub>dep</sub> characteristics       |                               |               |                          |
|------------------------------|-----------------------------|-------------------------|----------------------------|--------------------------------|-----------------------------------------|-------------------------------|---------------|--------------------------|
|                              | Mode                        | $E$ , <sup>a</sup><br>V | $\tau$ , <sup>b</sup><br>s | $Q_{red}$ ,<br>$\mu A \cdot s$ | $E$ range in $Q_{ox}$<br>calculation, V | $Q_{ox}$ ,<br>$\mu A \cdot s$ | $m$ , $\mu g$ | $Q_{ox}/ Q_{red}$ ,<br>% |
| -                            | CV                          | +0.05                   | -                          | 120                            | 0.51-1.20                               | 78                            | 0.16          | 65                       |
|                              |                             | -0.85                   | -                          | -                              | 0.08-1.20                               | 200                           | 0.41          | -                        |
| MV <sup>2+</sup><br>(2.0 mM) | CV                          | +0.05                   | -                          | 165                            | 0.60-1.20                               | 92                            | 0.19          | 56                       |
|                              |                             | -0.85                   | -                          | -                              | 0.57-1.20                               | 187                           | 0.38          | -                        |
|                              | micro-<br>electro-<br>lysis | +0.20                   | 0                          |                                | 0.64-1.20                               | 63                            | 0.13          | -                        |
|                              |                             | +0.20                   | 30                         |                                | 0.57-1.20                               | 125                           | 0.26          | -                        |
|                              |                             | +0.20                   | 60                         |                                | 0.46-1.20                               | 211                           | 0.37          | -                        |
|                              |                             | -0.85                   | 0                          |                                | 0.36-1.20                               | 120                           | 0.25          | -                        |
|                              |                             | -0.85                   | 30                         |                                | 0.39-1.20                               | 77                            | 0.16          | -                        |
|                              |                             | -0.85                   | 60                         |                                | 0.29-1.2                                | 38                            | 0.08          | -                        |

<sup>a</sup> CV reversal potential or microelectrolysis potential; <sup>b</sup> microelectrolysis time

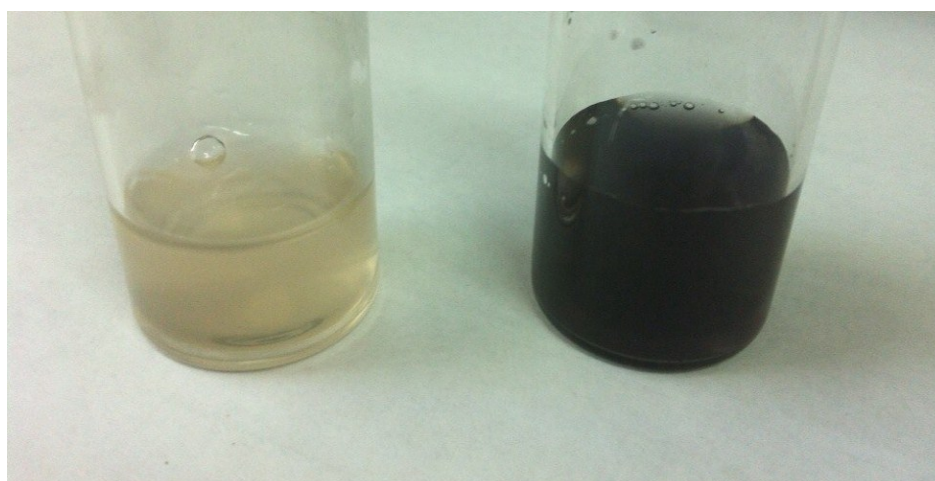

**Fig. S2** A picture of 2.0 mM MV<sup>2+</sup> + 1.5 mM AuCl + 1 g/l SiO<sub>2</sub>-NHR solutions in H<sub>2</sub>O/0.1 M NaCl: starting solution (left) and solution after reduction at -0.90 V ( $Q = 1.3 F$  with respect to AuCl) (right).

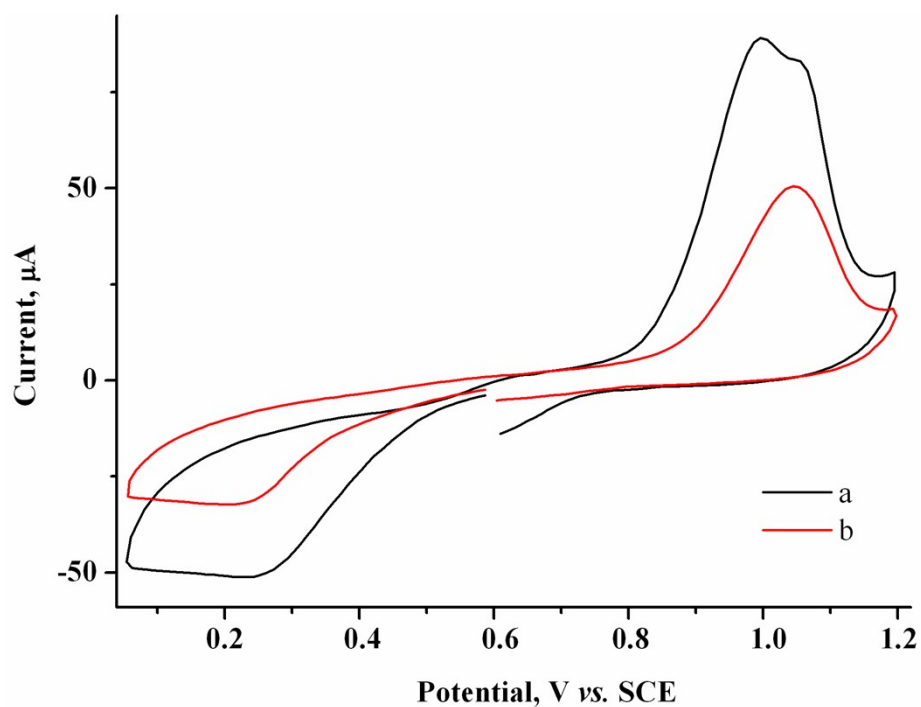

**Fig. S3** CV curves of 1.5 mM AuCl in the absence (a) and in the presence of 75 mM PVP (b). GC, H<sub>2</sub>O/0.1 M NaCl,  $v = 100$  mV/s.

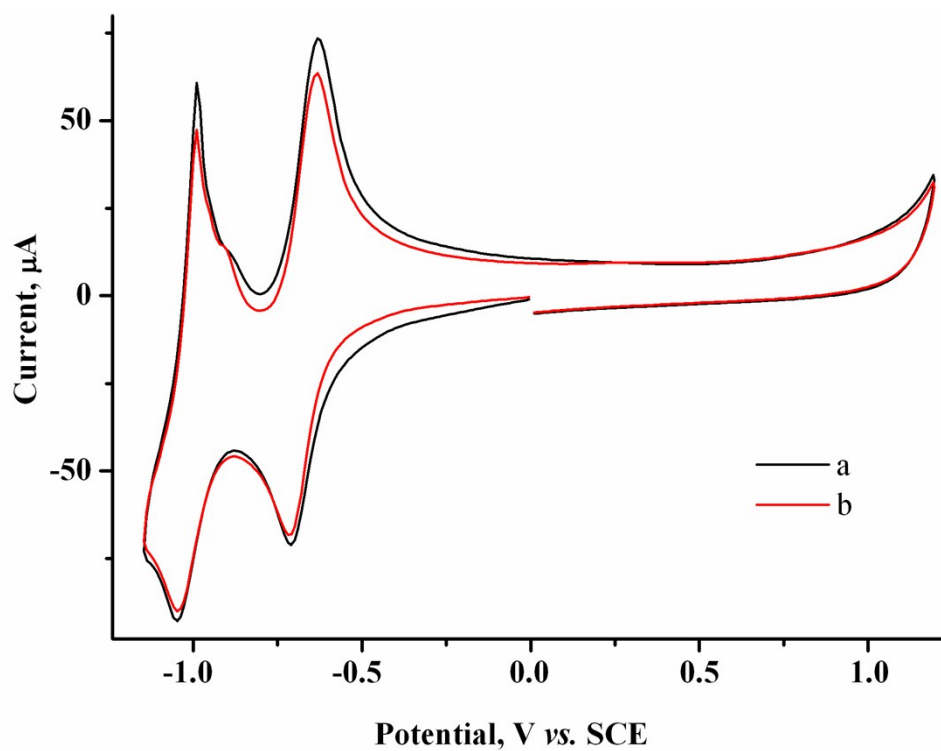

**Fig. S4** CV curves of 2.0 mM MV<sup>2+</sup> in the absence (a) and in the presence of 75 mM PVP (b). GC, H<sub>2</sub>O/0.1 M NaCl,  $v = 100$  mV/s.

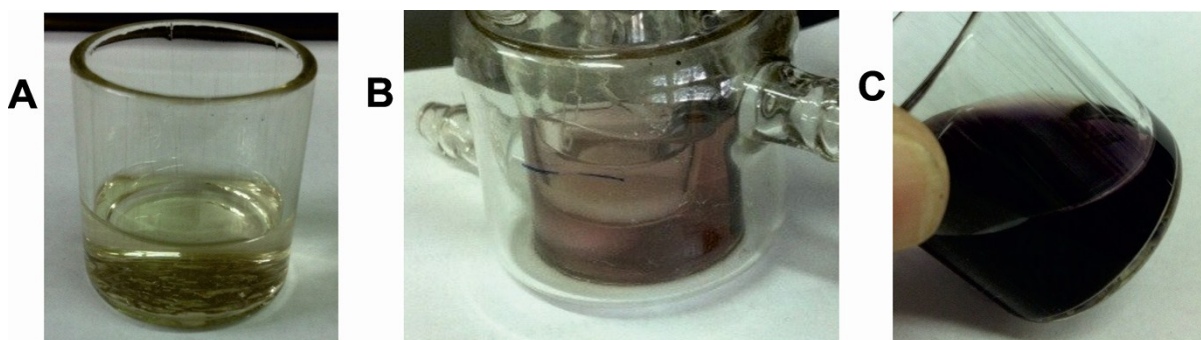

**Fig. S5** A picture of 2.0 mM  $MV^{2+}$  + 1.5 mM AuCl + 75 mM PVP solutions in  $H_2O/0.1$  M NaCl: starting solution (1) and solution after reduction at -0.90 V at  $Q = 0.2$  F (2) and 1.1 F (3) with respect to AuCl.

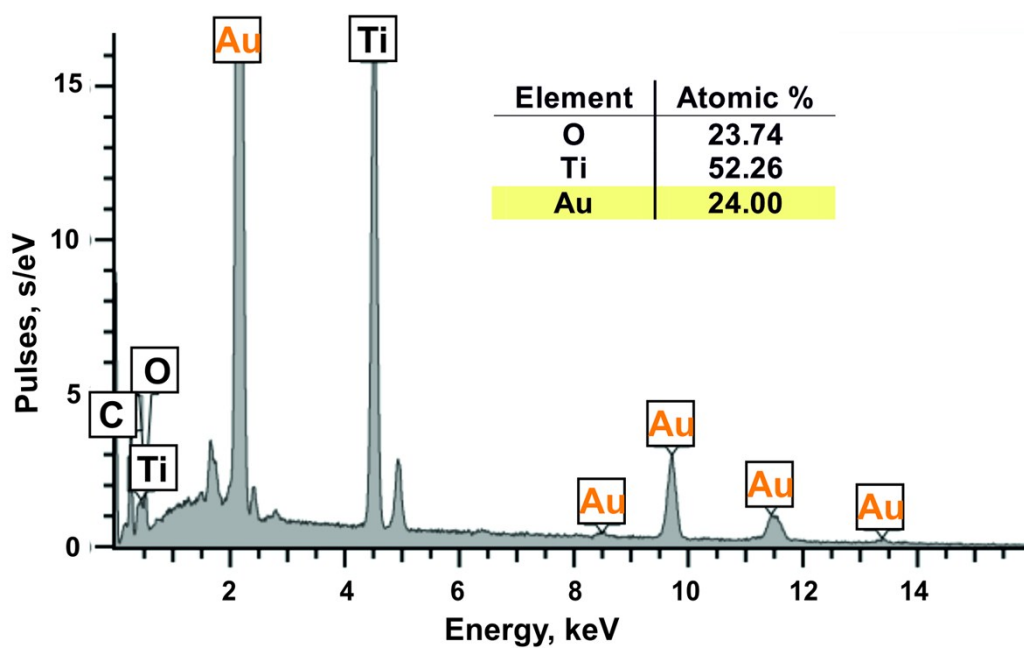

**Fig. S6** Energy-dispersion spectrum of gold nanoparticles stabilized by PVP on a titanium support.

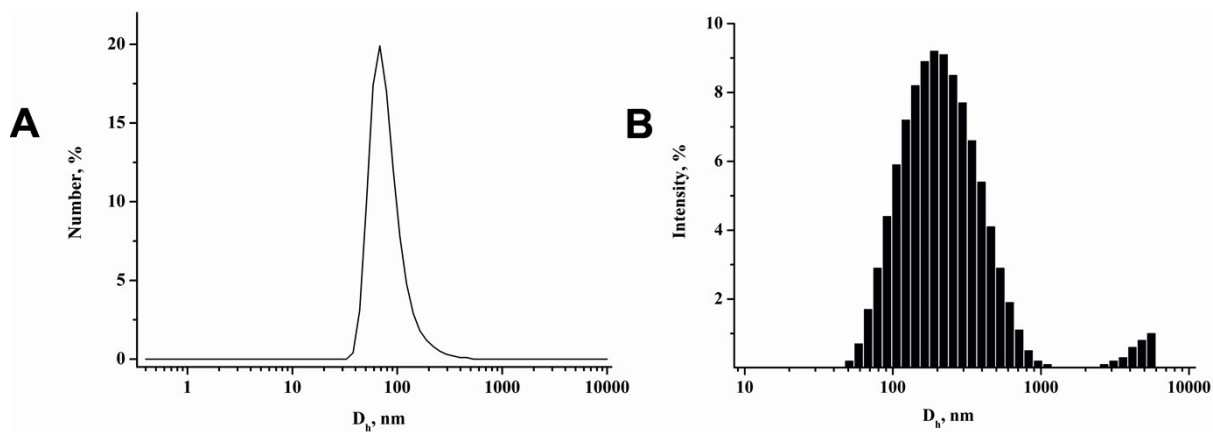

**Fig. S7** DLS data on the number (a) and intensity (b) of gold nanoparticles stabilized by PVP in  $H_2O$ .
